## Hidden Hypercapnia in Hemorrhagic Hypotension

D. F. J. Halmagyi, M.D., D.Sc., M.R.A.C.P.,\* M. Kennedy, B.Sc.,†  
D. Varga, B.Sc.‡

In hemorrhagic shock with normal or reduced  $P_{aCO_2}$ , the mixed venous blood was severely hypercapnic. The shock-induced rise in the arteriovenous  $P_{CO_2}$  gradient was unaffected by hyperventilation and inversely related to blood flow. Since the acid-base composition of the extracellular fluid is likely to be closer to that of venous blood than to that of arterial blood, the authors conclude that in hemorrhagic shock metabolic and respiratory components are equally important in producing tissue acidosis. Combined blockade of the  $\alpha$ - and  $\beta$ -adrenergic receptors in hemorrhagic shock suppressed both lactic acid formation and  $CO_2$  production and significantly reduced the arteriovenous  $P_{CO_2}$  and pH gradients. (Key words: Combined adrenergic receptor blockade; Hyperventilation; Metabolic acidosis; Venous blood gases; Venous blood acid-base composition.)

METABOLIC ACIDOSIS mitigated by respiratory compensation is considered a typical response to hemorrhagic shock.<sup>1</sup> Studies of arterial blood form the usual basis of this assumption, although it is understood that the acid-base composition of extracellular fluid is closer to that of mixed venous blood. However, normally, the gradient between  $P_{aCO_2}$  and  $P_{vCO_2}$  and hydrogen ion activity ( $/H^+$ ) is small and predictable<sup>2</sup> and that for lactic acid is virtually absent.<sup>3</sup> It is tacitly assumed that this relationship remains unaffected in shock states.

$CO_2$  is stored in the body in two main compartments: the alveolar-arterial compartment, equilibrated at alveolar  $P_{CO_2}$ , and the peripheral stores, in which the prevailing  $P_{CO_2}$  is that of the mixed venous blood.<sup>4</sup> Reduction in blood flow restricts the exposure between the

two compartments and, subject to tissue  $CO_2$  production, the gradient between  $P_{aCO_2}$  and  $P_{vCO_2}$  increases.<sup>5,6</sup> Theoretically, such a situation is expected to occur in shock, yet available data are few and contradictory. Arteriovenous  $P_{CO_2}$  and pH differences have been reported to be normal in clinical shock<sup>7</sup> and were considerably increased in bled dogs.<sup>8</sup> It appeared of interest, therefore, to examine the reliability of the arterial blood in reflecting the nature of extracellular acid-base disturbances in various stages of hemorrhagic shock.

It has been claimed that hyperventilation, if begun in the pre-bleeding period, somewhat improves the survival rate in hemorrhagic shock,<sup>9</sup> but in the absence of circulatory measurements the explanation has remained tentative. While circulation is not grossly depressed, hyperventilation may deplete the peripheral  $CO_2$  stores, and we wondered if this would reduce subsequent extracellular acidosis, thus accounting for the better survival rate.

Simultaneous blockade of  $\alpha$ - and  $\beta$ -adrenergic receptors reduces lactic acidosis and improves tolerance to hemorrhage.<sup>10,11,12</sup> It appeared logical to assume that this treatment would also affect extracellular acid-base composition. In this paper we report a study we undertook to substantiate this assumption.

### Methods

#### MATERIAL

Eighteen greyhounds weighing 23 to 31 kg were used. The fasting supine animals were anesthetized with 15 mg/kg of thiopental, injected intravenously, followed by a continuous intravenous infusion of 0.20 mg/kg/min thiopental. After bleeding had commenced the dose could be considerably reduced, or even suspended, without the animals' regaining consciousness. A cuffed Magill tube was introduced into the trachea and both femoral

\* Director of the Gordon Craig Research Laboratory and reader in experimental surgery.

† Research assistant of the National Heart Foundation of Australia.

‡ Senior professional officer.

Received from the Gordon Craig Research Laboratory, Department of Surgery, University of Sydney, Sydney, N.S.W., Australia. Accepted for publication August 20, 1970. Supported by the National Heart Foundation of Australia.

arteries and veins were exposed. Repeated doses of 2 mg/kg of heparin were administered. A thermistor probe was introduced into the inferior vena cava and temperature was monitored continuously with an electric thermometer.

A cardiac catheter was passed via the femoral vein under fluoroscopic guidance into the pulmonary artery. Polyethylene tubes were inserted into the femoral arteries, and one was connected to a large siliconized reservoir.

#### MEASUREMENTS

Oxygen saturation of arterial and mixed venous blood was measured with a Haemoreflexor (Kipp and Zonen, Delft, Holland). Hemoglobin content of arterial blood was measured spectrophotometrically. Blood samples were taken simultaneously from the femoral and pulmonary arteries and analyzed immediately at 38°C for  $P_{CO_2}$ ,  $P_{O_2}$  and pH using Radiometer (Copenhagen) microelectrodes operating through a model 22 pH meter (Radiometer).

Expired air was collected in Douglas bags, measured in a type E-40 wet test gas meter (Parkinson-Cowan, London), and analyzed for  $CO_2$  concentration in a Beckman model LB-1 infrared  $CO_2$  analyzer and for  $O_2$  concentration in a Beckman model E-2 paramagnetic  $O_2$  analyzer.

Femoral arterial pressure was measured with a Sanborn transducer and recorded on a Sanborn oscillograph.

Lactic acid in arterial blood<sup>13</sup> was measured as previously described.<sup>11</sup>

#### CALCULATIONS

The Fick principle was used to calculate cardiac output. Oxygen extraction ratio was calculated from  $O_2$  transport ( $O_2$  content of arterial blood  $\times$  cardiac index) and  $O_2$  uptake. Arterial and mixed venous pH values were converted into  $H^+$  and expressed in  $mEq/L$ . Gas tensions and  $/H^+$  were corrected for blood temperature using the blood-gas calculator (Radiometer, Copenhagen). All volumes and flows were expressed on the basis of body surface area (BSA). Standard statistical methods were used to analyze the results.

#### GROUPS; PROTOCOL; AGENTS USED

*Group A, Intact Dogs.* In each of seven dogs, after control measurements (period I), the clamp was removed from the tube connecting the femoral artery with a reservoir and the dog was bled to a (mean) blood pressure of 40–60 torr, the blood being collected in the reservoir. Measurements were made at approximately 40, 90 and 170 min (periods III, IV and V, respectively). Subsequently, the shed blood was rapidly (within 10 min) reinfused, and measurements were repeated after 30 and 90 min (periods VI and VII, respectively). The trachea was then extubated, and the dog turned to its side and restrained with a canvas belt. A continuous intravenous infusion of 2 ml/min of isotonic saline solution with heparin was started and maintained until death. Most dogs remained unconscious; others were given a continuous intravenous infusion of 0.025–0.050 mg/kg/min thiopental. Arterial pressure was recorded continuously.

*Group B, Hyperventilated Dogs.* After control measurements each of five dogs was connected to a Bird Mark VIII respirator (Bird Corp., Palm Springs, Cal.). Air was used at pressures of +15 and –4 cm  $H_2O$ . The rate of breathing was varied to produce a wide spectrum of  $P_{aCO_2}$  levels. After an hour, as  $P_{aCO_2}$  stabilized at the desired level, measurements were made (period II) and the dog was bled into the reservoir and blood was reinfused as described above. After the first post-reinfusion measurement the respirator was disconnected, and an hour later further measurements were made in the spontaneously-breathing dog. Subsequently the trachea was extubated and the saline and heparin solution was infused as described above.

*Group C, Treated Dogs.* An hour prior to the experiment, each of six dogs was given a slow (30 min) intravenous infusion of 1 mg/kg phenoxymethazine (Dibenzyline, Smith, Kline and French). Twenty minutes before the experiment a continuous intravenous infusion of 4–6  $\mu g/kg/min$  propranolol (Inderal, Imperial Chemical Industries) was commenced. Control measurements were followed by bleeding and reinfusion as described; after the first postreinfusion measurement (period VI) propranolol infusion was discontinued, and a

TABLE 1. Some General Effects of Hemorrhage in Intact (A) and Hyperventilated (B) Dogs and in Dogs Subjected to Combined ( $\alpha + \beta$ ) Adrenergic Receptor Blockade (C)

|                                                   | Group | Time (min) | Blood Loss ml/m <sup>2</sup> BSA | Cardiac Output (l/min/m <sup>2</sup> ) | Arterial Mean Pressure (torr) | Plasma Lactate (mEq/l) |
|---------------------------------------------------|-------|------------|----------------------------------|----------------------------------------|-------------------------------|------------------------|
| Period I, control                                 | A     |            |                                  | 4.42 (1.73)                            | 152 (19)                      | 0.75 (0.70)            |
|                                                   | B     |            |                                  | 4.03 (0.90)                            | 158 (15)                      | 0.49 (0.21)            |
|                                                   | C     |            |                                  | 3.35 (0.43)                            | 127 (24)                      | 1.14 (0.55)            |
| Period II, control on assisted ventilation        | B     |            |                                  | 4.89 (1.00)                            | 133 (34)                      | 1.39 (0.61)            |
| Period III, 40 min after commencement of bleeding | A     | 38 (8)     | 1106 (341)                       | 1.12 (0.35)                            | 56 (8)                        | 2.35 (1.42)            |
|                                                   | B     | 49 (15)    | 1187 (306)                       | 1.19 (0.27)                            | 49 (3)                        | 4.47 (0.82)            |
|                                                   | C     | 47 (5)     | 1022 (193)                       | 1.39 (0.25)                            | 47 (3)                        | 1.45 (1.06)            |
| Period IV, 90 min after commencement of bleeding  | A     | 86 (10)    | 1318 (305)                       | 1.07 (0.28)                            | 51 (5)                        | 4.60 (2.40)            |
|                                                   | B     | 100 (33)   | 1475 (278)                       | 1.16 (0.20)                            | 44 (4)                        | 8.06 (0.90)            |
|                                                   | C     | 93 (10)    | 1257 (216)                       | 1.17 (0.29)                            | 43 (4)                        | 1.86 (1.58)            |
| Period V, 170 min after commencement of bleeding  | A     | 177 (35)   | 1239 (296)                       | 1.11 (0.42)                            | 49 (3)                        | 4.79 (1.69)            |
|                                                   | B     | 171 (21)   | 1262 (192)                       | 1.15 (0.27)                            | 43 (2)                        | 7.88 (3.54)            |
|                                                   | C     | 155 (15)   | 1230 (115)                       | 0.91 (0.16)                            | 43 (3)                        | 1.57 (1.38)            |
| Period VI, 30 min postreinfusion                  | A     | 209 (21)   |                                  | 2.89 (0.94)                            | 113 (22)                      | 4.83 (1.24)            |
|                                                   | B     | 218 (17)   |                                  | 3.02 (0.57)                            | 103 (20)                      | 5.46 (4.91)            |
|                                                   | C     | 200 (15)   |                                  | 2.37 (0.37)                            | 121 (12)                      | 2.12 (1.72)            |
| Period VII, 90 min postreinfusion                 | A     | 285 (57)   |                                  | 2.66 (1.26)                            | 113 (35)                      | 3.14 (1.61)            |
|                                                   | B     | 279 (29)   |                                  | 2.25 (0.66)                            | 113 (19)                      | 4.47 (4.38)            |
|                                                   | C     | 289 (29)   |                                  | 1.95 (0.44)                            | 101 (18)                      | 0.65 (0.29)            |

further measurement was made an hour later (period VII). Subsequently the trachea was extubated and the infusion of saline and heparin solution begun. All dogs in this group remained conscious and required anesthesia.

### Results

Results are shown in tables 1 and 2.

#### GROUP A: INTACT DOGS

**Effects of Hemorrhage.** Cardiac output fell to 25 per cent, and blood pressure to 30 per cent, of the control values, and both stayed at these levels during the hypovolemic phase. Lactic acid concentrations in plasma increased progressively.  $P_{aO_2}$  remained constant;  $P_{aCO_2}$  decreased (significantly in period III),  $/H^+/\Delta$  increased progressively and was significantly ( $P < 0.01$ ) elevated in periods IV and V. In mixed venous blood,  $P_{O_2}$  decreased,  $P_{CO_2}$  and  $/H^+/\Delta$  increased. The change in  $P_{rCO_2}$  during the hypovolemic phase (between periods III and V) was not significant, but the continued

increase in  $/H^+/\Delta$  (between periods III and V) was significant ( $P < 0.01$ ). These changes resulted in a considerable increase in arteriovenous  $P_{CO_2}$  and  $/H^+/\Delta$  gradients.

**Effects of Reinfusion.** Systemic arterial pressure remained lower ( $P < 0.01$ ) than during the resting period, and cardiac output was restored to a level not significantly different from the resting value. Arterial blood gases and  $/H^+/\Delta$  were not significantly different from the hypovolemic values.  $P_{rO_2}$  increased ( $P < 0.01$ ) but remained lower ( $P < 0.05$ ) than during the control period.  $/H^+/\Delta$  remained elevated, and in both postreinfusion periods (VI-VII) it was higher ( $P < 0.02$ ) than the resting value.  $P_{rCO_2}$  decreased.

All dogs relapsed into shock and died within 4.5 ( $\pm 1.5$ ) hours after reinfusion of the shed blood.

#### GROUP B: HYPERVENTILATED DOGS

**Effects of Assisted Ventilation (Period II).** Cardiac output and blood pressure were not significantly affected, plasma lactic acid in-

TABLE 2. Effects of Hemorrhage on Arterial and Mixed Venous O<sub>2</sub> and CO<sub>2</sub> Tensions and /H<sup>+</sup>/ in Intact (A) and Hyperventilated (B) Dogs and in Dogs Subjected to Combined ( $\alpha + \beta$ ) Adrenergic Receptor Blockade (C)

|                                                   | Group | P <sub>AO<sub>2</sub></sub><br>(torr) | P <sub>VO<sub>2</sub></sub><br>(torr) | P <sub>ACO<sub>2</sub></sub><br>(torr) | P <sub>ACO<sub>2</sub></sub><br>(torr) | /H <sup>+</sup> /A<br>(mEq/L) | /H <sup>+</sup> /B<br>(mEq/L) |
|---------------------------------------------------|-------|---------------------------------------|---------------------------------------|----------------------------------------|----------------------------------------|-------------------------------|-------------------------------|
| Period I, control                                 | A     | 86(10)                                | 53(4)                                 | 42(5)                                  | 46(5)                                  | 46(5)                         | 47(5)                         |
|                                                   | B     | 87(8)                                 | 51(6)                                 | 40(9)                                  | 44(8)                                  | 43(4)                         | 45(4)                         |
|                                                   | C     | 82(13)                                | 50(9)                                 | 42(8)                                  | 46(7)                                  | 42(4)                         | 44(4)                         |
| Period II, control on assisted ventilation        | B     | 103(9)                                | 43(6)                                 | 15(7)                                  | 21(5)                                  | 28(5)                         | 30(5)                         |
| Period III, 40 min after commencement of bleeding | A     | 91(6)                                 | 28(8)                                 | 36(5)                                  | 60(15)                                 | 50(4)                         | 60(6)                         |
|                                                   | B     | 108(2)                                | 22(6)                                 | 15(3)                                  | 33(11)                                 | 39(7)                         | 48(9)                         |
|                                                   | C     | 81(11)                                | 27(5)                                 | 40(6)                                  | 54(6)                                  | 47(5)                         | 53(5)                         |
| Period IV, 90 min after commencement of bleeding  | A     | 85(6)                                 | 23(4)                                 | 33(4)                                  | 69(4)                                  | 56(5)                         | 71(6)                         |
|                                                   | B     | 109(5)                                | 22(5)                                 | 16(7)                                  | 51(13)                                 | 54(14)                        | 75(14)                        |
|                                                   | C     | 84(4)                                 | 24(4)                                 | 36(7)                                  | 54(6)                                  | 47(6)                         | 54(7)                         |
| Period V, 170 min after commencement of bleeding  | A     | 87(9)                                 | 24(4)                                 | 36(5)                                  | 74(11)                                 | 60(6)                         | 74(11)                        |
|                                                   | B     | 104(7)                                | 24(8)                                 | 16(7)                                  | 52(14)                                 | 54(16)                        | 73(25)                        |
|                                                   | C     | 87(9)                                 | 22(3)                                 | 32(10)                                 | 55(11)                                 | 45(7)                         | 55(9)                         |
| Period VI, 30 min postreinfusion                  | A     | 83(20)                                | 43(9)                                 | 44(11)                                 | 64(25)                                 | 67(14)                        | 72(19)                        |
|                                                   | B     | 104(3)                                | 44(7)                                 | 19(5)                                  | 30(10)                                 | 54(22)                        | 59(26)                        |
|                                                   | C     | 84(9)                                 | 40(3)                                 | 33(10)                                 | 42(7)                                  | 46(8)                         | 49(8)                         |
| Period VII, 90 min postreinfusion                 | A     | 85(22)                                | 40(5)                                 | 38(19)                                 | 53(15)                                 | 56(14)                        | 62(14)                        |
|                                                   | B     | 93(14)                                | 45(9)                                 | 35(7)                                  | 60(10)                                 | 66(22)                        | 71(25)                        |
|                                                   | C     | 79(8)                                 | 40(6)                                 | 36(6)                                  | 45(8)                                  | 46(5)                         | 49(6)                         |

creased ( $P < 0.02$ ),  $P_{AO_2}$  increased ( $P < 0.02$ ), and both mixed venous and arterial  $P_{CO_2}$  and /H<sup>+</sup>/ values decreased ( $P < 0.01$ ). The decrease in  $P_{VO_2}$  was not significant.

#### Effects of Hemorrhage (Periods III–V).

Cardiac output fell to the same extent as in the previous group, but mean blood pressures in periods IV and V were lower ( $P < 0.05$ ) than the corresponding values in the control group. In periods III and IV plasma lactic acid concentrations were higher ( $P < 0.02$ ) than during the corresponding periods in the controls, but in the last hypovolemic period (Period V) this difference was no longer significant.  $P_{AO_2}$  remained constant and  $P_{VO_2}$  decreased as in the controls.  $P_{ACO_2}$  remained constant and  $P_{VCO_2}$  increased progressively but remained lower than in the controls. /H<sup>+</sup>/A increased, and in periods IV and V the values were no longer significantly different from the corresponding values in the controls; /H<sup>+</sup>/B increased, and in periods IV and V the values

were virtually identical to the corresponding values in the control group.

Volumes of blood shed by these dogs were comparable to values for the controls.

**Effects of Reinfusion.** After reinfusion of the shed blood, but while ventilation still was assisted (period VI) cardiac output increased, but it remained lower ( $P < 0.01$ ) than during period II; blood pressure was not significantly different from that in period II, and there were no significant changes in arterial blood gases and /H<sup>+</sup>/B. In the mixed venous blood,  $P_{O_2}$  increased and  $P_{CO_2}$  and /H<sup>+</sup>/ decreased, but the latter change was not significant.

After spontaneous breathing had been restored (period VII), blood pressure remained lower ( $P < 0.01$ ) than in period II. Arterial and mixed venous  $P_{CO_2}$  and /H<sup>+</sup>/ values increased ( $P < 0.01$ ), and the latter were higher ( $P < 0.05$ ) than in period I.

All dogs relapsed into shock and died within 6.3 ( $\pm 0.7$ ) hours after reinfusion of the shed blood.

## GROUP C: TREATED DOGS

*Effects of Blockade (Period I).* There were no significant differences from the control values of the two previous groups.

*Effects of Hemorrhage.* Changes in cardiac output were not significantly different from the corresponding values in the two previous groups; blood pressure was similar to that of group B and lower ( $P < 0.02$ ) than that in the control group. Changes in arterial and mixed venous  $P_{O_2}$  were similar to those in group A, but changes in arterial and mixed venous  $P_{CO_2}$  failed to attain statistical significance. There was no significant change in  $/H^+/_A$ , and the increases in  $/H^+/_v$  ( $P < 0.01$ ) in all three hypovolemic periods were less ( $P < 0.01$ ) than those in the previous two groups. There was no significant change in plasma lactic acid.

Blood loss in these dogs was comparable to blood losses in the previous two groups.

*Effects of Reinfusion.* Cardiac output increased but remained lower ( $P < 0.01$ ) than during the control period. Blood pressure was first restored to near-control level but then fell, and in period VII it was lower ( $P < 0.05$ ) than during the control period. Blood gases and acid-base composition were not significantly affected.

Next morning, 18 hours after reinfusion of the shed blood, all dogs were alive.

## Discussion

The severe venous hypercapnia in shocked dogs with normal or reduced  $P_{ACO_2}$  values suggests that respiratory compensation, unless excessive, was limited to the alveolar-arterial compartment and, contrary to previous claims,<sup>14</sup> would not effectively reduce tissue  $P_{CO_2}$ . With an excessive increase in ventilation produced by mechanical assistance, both arterial and mixed venous  $P_{CO_2}$  values fell, yet the shock-induced rise in the arteriovenous  $P_{CO_2}$  gradient remained unaffected and extracellular acidity was aggravated by the additional stimulation of lactic acid release, a well-known sequel of arterial hypocapnia.<sup>15</sup> In our dogs  $P_{rCO_2}$  was in the vicinity of the level which in respiratory failure is considered the limit of consciousness,<sup>16</sup> and this may partly account for the fact that shocked animals require so little anesthesia. We are prompted to con-

clude that, contrary to accepted views, tissue acidosis in shock should not be classified as purely metabolic: its hypercapnic component remains concealed only when arterial blood is used for analysis. Hidden tissue hypercapnia in shock offers a further explanation for the therapeutic inefficiency of sodium bicarbonate infusion,<sup>17</sup> and is likely to contribute to the postreinfusion increases in  $/H^+/_A$  and  $P_{ACO_2}$ .<sup>11</sup>

The slope of the total-body  $CO_2$  dissociation curve increases with time, and for experiments lasting as long as two hours is approximately 1.7 ml/kg/torr.<sup>4</sup> In the absence of data for longer periods, we used this value for our three-hour experimental period, and it is likely, therefore, that our calculations represent an underestimate. Assuming that arterial and mixed venous  $P_{CO_2}$  represent alveolar and tissue  $P_{CO_2}$  levels, the total volume of  $CO_2$  retained in both spontaneously-breathing and hyperventilated bled dogs amounted to 1.2 l, or 5 per cent of resting  $CO_2$  output. This probably would have escaped attention even if expired air had been collected continuously.

In intact dogs, the arteriovenous  $P_{CO_2}$  gradient was influenced by the duration of hypotension and by blood flow. Cardiac output remained stable during hypovolemia, yet the arteriovenous  $P_{CO_2}$  gradient increased in the first 80-100 min and remained constant afterwards. More prolonged observations were obviated by the spontaneous uptake of blood from the reservoir, which usually commenced at 150-170 min. Using only values obtained after 90 min of hypovolemia, the relationship of blood flow and the arteriovenous  $P_{CO_2}$  gradient is shown in figure 1, and can be expressed by the equation:

$$Y = -14.95X + 53.2 \\ r = -0.7364$$

where  $Y$  = arteriovenous  $P_{CO_2}$  gradient, torr;  
 $X$  = cardiac output in l/min/m<sup>2</sup>BSA;  $r$  = regression coefficient.

We suggest that the absence of an arteriovenous  $P_{CO_2}$  gradient in Zahn's and Weil's patients<sup>7</sup> was probably the result of an absence of profound reduction in blood flow.

Venous desaturation is viewed as an indicator of the severity of shock. Comparing  $O_2$  extraction ratios and arteriovenous  $P_{CO_2}$  gradients we found (fig. 2) that the gradient

Fig. 1. Relationship of blood flow and arteriovenous  $P_{CO_2}$  gradient in nonmedicated shocked dogs (solid triangles) and in shocked dogs premedicated with phenoxybenzamine and propranolol (solid squares). Values included in this diagram were obtained no sooner than 90 min after the start of bleeding. Regression equations are shown in the text.

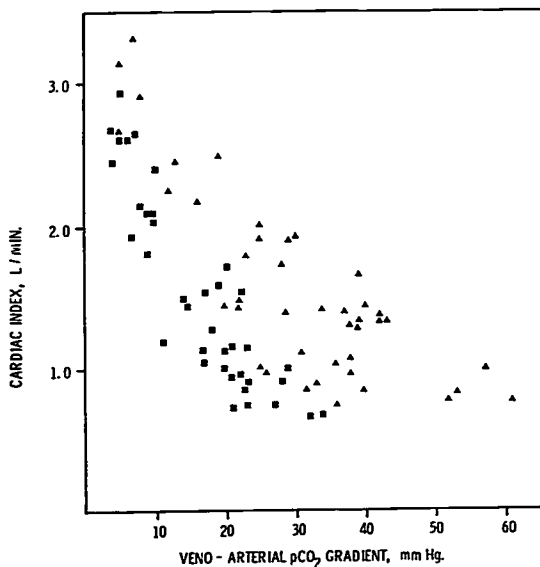

continued to rise even after the  $O_2$  extraction ratio reached its natural limit. It appears that  $P_{CO_2}$  may be a more useful index of the extent and duration of reduced tissue perfusion than  $P_{O_2}$ .

In the treated animals hemorrhage-induced venous hypercapnia was reduced: for comparable values of cardiac output the arteriovenous  $P_{CO_2}$  gradient was significantly less than in nonmedicated animals (fig. 1); this relationship can be expressed by the equation:

$$Y = -10.96X + 33.4$$

$$r = -0.8910$$

This was parallel to, but distinct from, the regression line obtained for nonmedicated animals. Using the same calculation as before, treated animals stored 360 ml of  $CO_2$ , representing only 1.9 per cent of resting  $CO_2$  production, or less than half of that retained by nonmedicated animals. Since the hemodynamic states of the two groups of dogs were virtually identical, this could not be accounted for by improved tissue perfusion, but rather

must have been caused by blockade-induced suppression of the calorogenic effect of endogenous catecholamines, resulting in reduced  $CO_2$  production.

Owing to venous hypercapnia,  $/H^+/_v$  in shocked dogs was 10–15  $mEq/l$  higher than  $/H^+/_a$ , and since peripheral venous lactate levels tended to exceed those of the mixed venous blood, acidemia in the peripheral veins probably was even more pronounced. Brown *et al.*<sup>8</sup> found in hemorrhagic shock that extracellular  $/H^+/_v$  is closely related to intracellular  $/H^+/_v$  in muscle. Using their regression equation and substituting  $H^+/_v$  for extracellular  $/H^+/_v$ , the calculated intracellular  $/H^+/_v$  in our dogs increased to 165  $mEq/l$ . Measured total-body intracellular  $/H^+/_v$  in bled dogs breathing 3 per cent  $CO_2$  ranges from 140 to 187  $mEq/l$ .<sup>14</sup>

In these experiments lactic acid levels in plasma were poorly related to  $P_{O_2}$ , and the relationship between the latter and  $/H^+/_v$  (figure 3) probably was determined by  $P_{CO_2}$ .

Combined adrenergic receptor blockade sup-

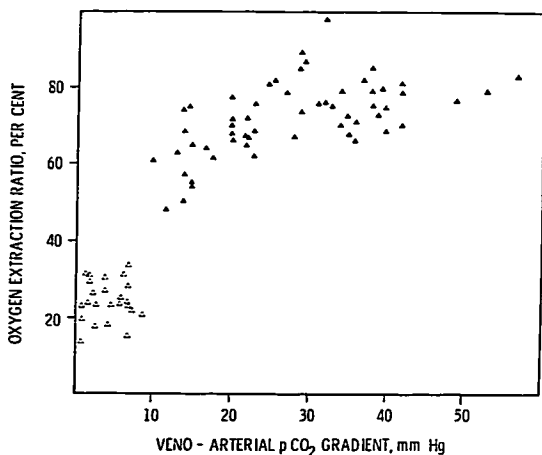

FIG. 2. Relationship of the oxygen extraction ratio and arteriovenous  $P_{CO_2}$  gradient in normovolemic (open triangles) and hypovolemic (solid triangles) dogs.

pressed both lactic acid release and  $CO_2$  production, resulting in a lesser increase in  $/H^+/\bar{v}$ : for the same values of  $P_{VO_2}$ ,  $/H^+/\bar{v}$  remained lower in treated than in nonmedicated dogs (fig. 3), and this difference was significant. Since combined adrenergic receptor blockade

also prolongs survival, the possible relationship between extracellular acid-base composition and tolerance to hemorrhage requires further analysis.

Severity and outcome in clinical and experimental shock are poorly related to arterial

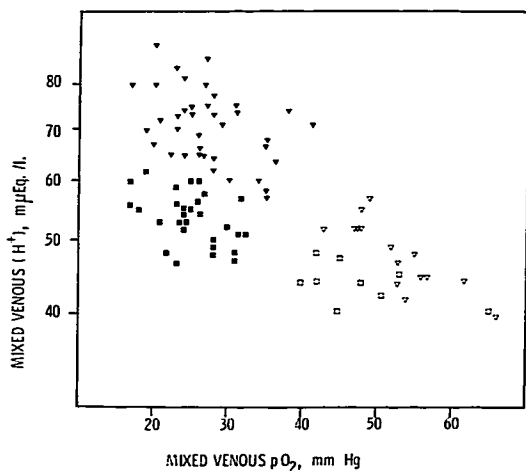

FIG. 3. Relationship of mixed venous  $P_{O_2}$  and  $/H^+/\bar{v}$  in normovolemic (open figures) and hypovolemic (solid figures) dogs. Nonmedicated dogs are represented by triangles; animals subjected to  $\alpha + \beta$  adrenergic receptor blockade, by squares.

acid-base composition,<sup>18, 19</sup> and the dissociation between arterial and extracellular  $/H^+$ , as shown here, offers a valid excuse for the lack of such correlation.  $/H^+$  in all our bled animals fatally shocked exceeded 65 mEq/l, while remaining below 60 mEq/l in all those which remained alive during the period of observation. On the other hand, the administration of tris buffer, known to correct intracellular acidosis, fails to improve survival rate in hemorrhagic shock,<sup>20, 21</sup> and extracellular acidosis of comparable severity (although of shorter duration) may occur in exercise.<sup>22</sup> Consequently, our experiments should not be interpreted as suggesting that extracellular acidosis is causally related to irreversibility, but  $/H^+$  does appear to have a closer relationship to prognosis than  $/H^+/A$ .

Infused was supplied by Imperial Chemical Industries of Australia and New Zealand, Ltd.; Dibenzylamine was supplied by Smith, Kline and French (Australia), Pty. Ltd.; their support is gratefully acknowledged. John Frazer and Margaret Horvat gave skilful technical assistance.

### References

1. Cannon WB: Acidosis in cases of shock, hemorrhage and gas infection. *JAMA* 70:533-535, 1918
2. Ramachandran PR, Fairly IIB, Laws AK: Central venous blood as an index of acid-base oxygenation status. *Canad Anaesth Soc* 15: 332-346, 1968
3. Mitchell AM, Courmand A: The fate of circulating lactic acid in the human lung. *J Clin Invest* 34:474-476, 1955
4. Farhi LE: Gas stores of the body, *Handbook of Physiology*, section 3, Respiration, vol. 1. Edited by WO Fenn and H Rahm. Washington, American Physiological Society, 1965, pp 873-885
5. Longobardo GS, Cherniak NS, Staw I: Transients in carbon dioxide stores. *IEEE Trans Biomed Engin* 14:182-191, 1967
6. Cherniak NS Longobardo GS: Oxygen and carbon dioxide gas stores in the body. *Physiol Rev* 50:196-243, 1970
7. Zahn RL, Weil MH: Central venous blood for monitoring pH and  $P_{CO_2}$  in the critically ill patient. *J Thorac Cardiovasc Surg* 52:105-111, 1966

8. Brown EB Jr, Kim WG, Moorhead FA Jr: Intracellular pH during metabolic acidosis of intracellular and extracellular origin. *Proc Soc Exp Biol Med* 126:595-599, 1967
9. Brandfonbrener M, Whang IT: Effect of respiratory alkalosis on survival in hemorrhagic shock. *Circ Res* 21:461-468, 1967
10. Halmagyi DFJ, Gillett DJ, Irving MH: Partial and "complete" adrenergic blockade in post-hemorrhagic shock. *J Appl Physiol* 22: 457-494, 1967
11. Halmagyi DFJ, Irving MH, Varga D: Effect of adrenergic blockade on the metabolic response to hemorrhagic shock. *J Appl Physiol* 25:384-389, 1968
12. Zierott G, Papova E, Lundsgaard-Hansen P: Combined adrenergic blockade in experimental hemorrhagic hypotension. *Pflüger Arch Ges Physiol* 310:1-15, 1969
13. Olson GF: Optimal conditions for the enzymatic determination of l-lactic acid. *Clin Chem* 8:1-8, 1962
14. Bell DJ, Schloerb PR: Cellular response to endotoxin and hemorrhagic shock. *Surgery* 60:69-76, 1966
15. Eichenholz AR, Mulhausen O, Anderson EW, et al.: Primary hypoxemia: A cause of metabolic acidosis. *J Appl Physiol* 17:283-288, 1962
16. Refsum HIE: Relationship between state of consciousness and arterial hypoxemia and hypercapnia in patients with pulmonary insufficiency breathing air. *Clin Sci* 25:361-367, 1963
17. Baue AE, Tragus ET, Parkins WM: Effect of sodium chloride and bicarbonate in shock with metabolic acidosis. *Amer J Physiol* 212:54-60, 1967
18. Cloutier CT, Lowery BD, Carey LC: Acid-base disturbances in hemorrhagic shock. *Arch Surg* 98:551-557, 1969
19. Wilson RF, Krome R: Factors affecting prognosis in clinical shock. *Ann Surg* 169:93-101, 1969
20. Bergentz SE, Brief DK: The effect of pH and osmolality on the production of canine hemorrhagic shock. *Surgery* 58:412-419, 1964
21. Selmonosky CA, Goetz RH, State D: The role of acidosis in the irreversibility of experimental hemorrhagic shock. *J Surg Res* 3:491-496, 1963
22. Cruz JC, Rahm H, Farhi LE: Mixed venous  $P_{O_2}$ ,  $P_{CO_2}$ , pH and cardiac output during exercise in trained subjects. *J Appl Physiol* 27:431-434, 1969

### Drugs

**PENTAZOCINE ANALGESIA** In a double-blind assay, *d*-pentazocine was compared with *l*-pentazocine given principally for postoperative pain. It appears that analgesia resides principally in the *l*-isomer. (Forrest, W. H., Jr., and others: *Analgesic and Other Effects of the d- and l-Isomers of Pentazocine*, *Clin. Pharmacol. Ther.* 10: 468 (July) 1969.)
